# Supplementary material
Source: PubMed Central journal article supplement (PMC9758839)
Supplement: 12879_2022_7936_MOESM1_ESM.pdf [file 12879_2022_7936_MOESM1_ESM.pdf]

Additional File 1: Summary data of CHIKV laboratory testing results and analysis of symptoms observed as proportions of CHIKV positive and CHIKV negative study subjects

**Summary of CHIKV laboratory testing results**

| <b>CHIKV testing</b>       | <b>Samples collected</b> | <b>Tested</b> | <b>Positive n (%)</b> |
|----------------------------|--------------------------|---------------|-----------------------|
| Chikungunya RT-PCR (acute) | 1194                     | 1194          | 81 (6.8)              |
| Chikungunya ELISA*         |                          |               |                       |
| IgM (acute)                | 1194                     | 713           | 138 (19.4)            |
| IgG (acute-convalescent)   | 923                      | 735           | 181 (24.6)            |

\* Randomized samples tested due to supply shortages

**Summary of symptoms observed as proportions of CHIKV positive and CHIKV negative study**

**subjects**

| Parameter                  | CHIKV positive | Proportion of CHIKV Positive | CHIKV negative | Proportion of CHIKV Negative | Sig              | OR (95%CI)           |
|----------------------------|----------------|------------------------------|----------------|------------------------------|------------------|----------------------|
| <b>Number of subjects</b>  | <b>331</b>     | <b>100%</b>                  | <b>863</b>     | <b>100%</b>                  |                  |                      |
| <b>Symptoms reported</b>   |                |                              |                |                              |                  |                      |
| <i>Fever (100%)</i>        | 331            | 100%                         | 863            | 100%                         | -                | -                    |
| <i>Headache</i>            | 323            | 97.6%                        | 830            | 96.2%                        | 0.235            | 1.6 (0.8-3.7)        |
| <i>Sore throat</i>         | 244            | 73.7%                        | 683            | 79.1%                        | 0.050            | 0.7 (0.5-1.0)        |
| <i>Chills</i>              | 259            | 78.2%                        | 626            | 72.5%                        | <b>0.042</b>     | <b>1.4 (1.1-1.8)</b> |
| <i>Cough</i>               | 219            | 66.2%                        | 658            | 76.2%                        | <0.001           | 0.6 (0.5-0.8)        |
| <i>Malaise</i>             | 223            | 67.4%                        | 592            | 68.6%                        | 0.682            | 0.9 (0.7-1.2)        |
| <i>Muscle aches</i>        | 151            | 45.6%                        | 342            | 39.6%                        | 0.061            | 1.3 (1.0-1.7)        |
| <i>Joint pain</i>          | 109            | 32.9%                        | 223            | 25.8%                        | <b>0.015</b>     | <b>1.4 (1.1-1.9)</b> |
| <i>Nausea</i>              | 106            | 23.0%                        | 149            | 17.3%                        | <b>&lt;0.001</b> | <b>2.3 (1.7-3.0)</b> |
| <i>Vomit</i>               | 57             | 17.2%                        | 75             | 8.7%                         | <b>&lt;0.001</b> | <b>2.2 (1.5-3.2)</b> |
| <i>Abdominal cramp</i>     | 18             | 5.4%                         | 49             | 5.7%                         | 0.887            | 1.0 (0.5-1.7)        |
| <i>Shortness of breath</i> | 17             | 5.1%                         | 48             | 5.6%                         | 0.787            | 0.9 (0.5-1.6)        |
| <i>Lesion</i>              | 36             | 10.9%                        | 26             | 3.0%                         | <b>&lt;0.001</b> | <b>3.9 (2.3-6.7)</b> |
| <i>Rash</i>                | 10             | 3.0%                         | 22             | 2.5%                         | 0.643            | 1.2 (0.6-2.5)        |
| <i>Diarrhea</i>            | 9              | 2.7%                         | 22             | 2.5%                         | 0.851            | 1.1 (0.5-2.3)        |
| <i>Seizure</i>             | 1              | 0.3%                         | 9              | 1.0%                         | 0.225            | 0.3 (0.1-1.8)        |
| <i>Bloody urine</i>        | 1              | 0.3%                         | 0              | 0.0%                         | -                | -                    |
| <i>Bleeding</i>            | 0              | 0.0%                         | 1              | 0.1%                         | -                | -                    |
| <i>Jaundice</i>            | 1              | 0.3%                         | 0              | 0.0%                         | -                | -                    |
